# Supplementary figures and images for: A postsynaptic PI3K-cII dependent signaling controller for presynaptic homeostatic plasticity
Source: eLife journal article supplement (doi:10.7554/elife.31535), 2018-01-05

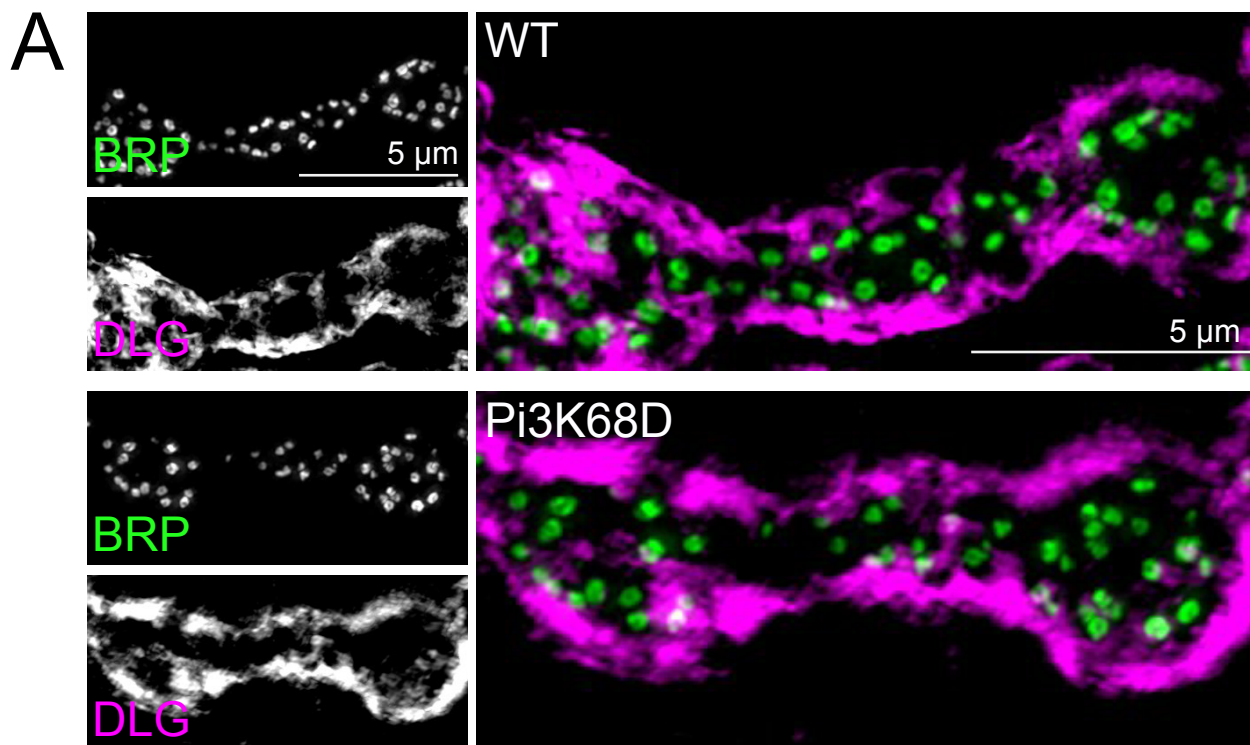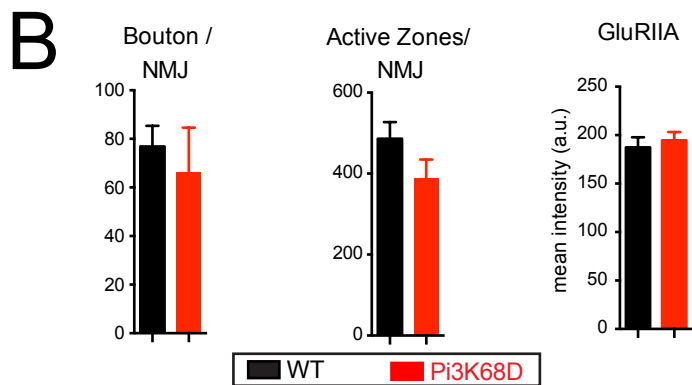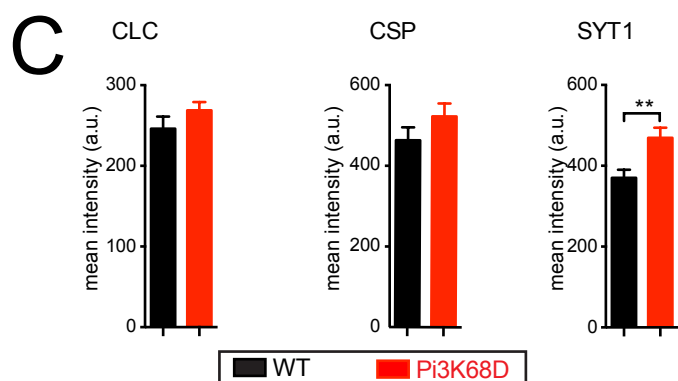

Supplement: supp [file elife-31535-supp-v1.zip]

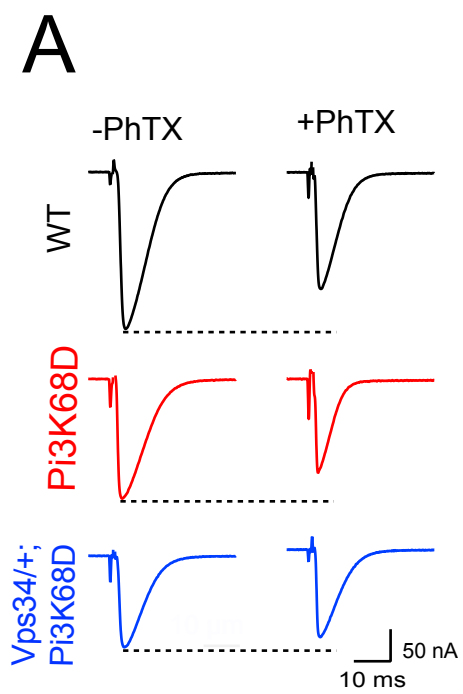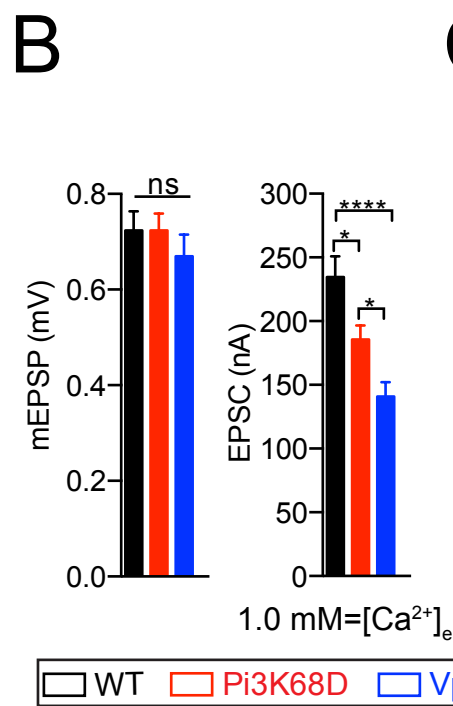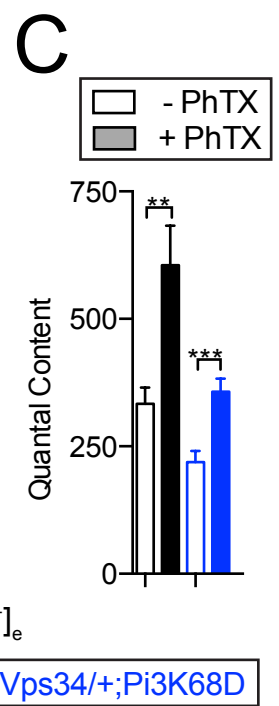

Supplement: supp [file elife-31535-supp-v1.zip]

A

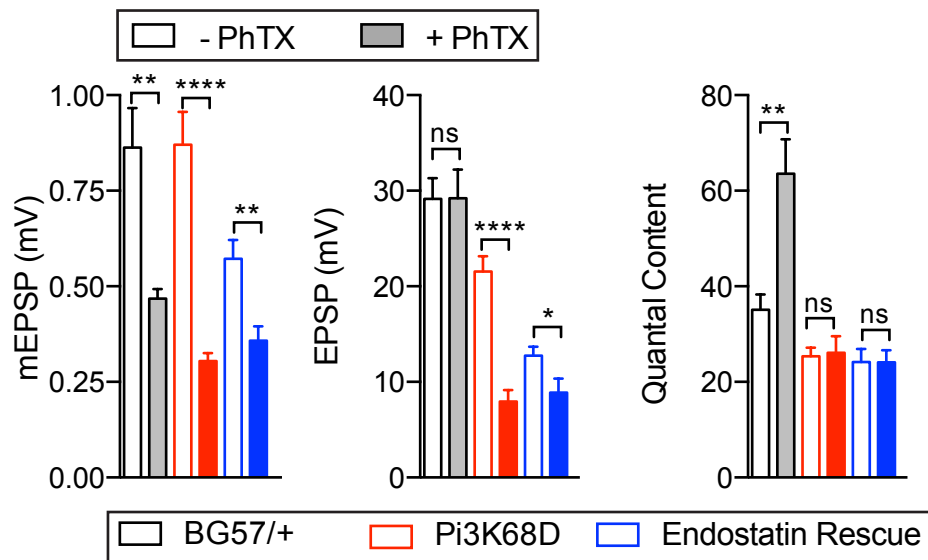

B

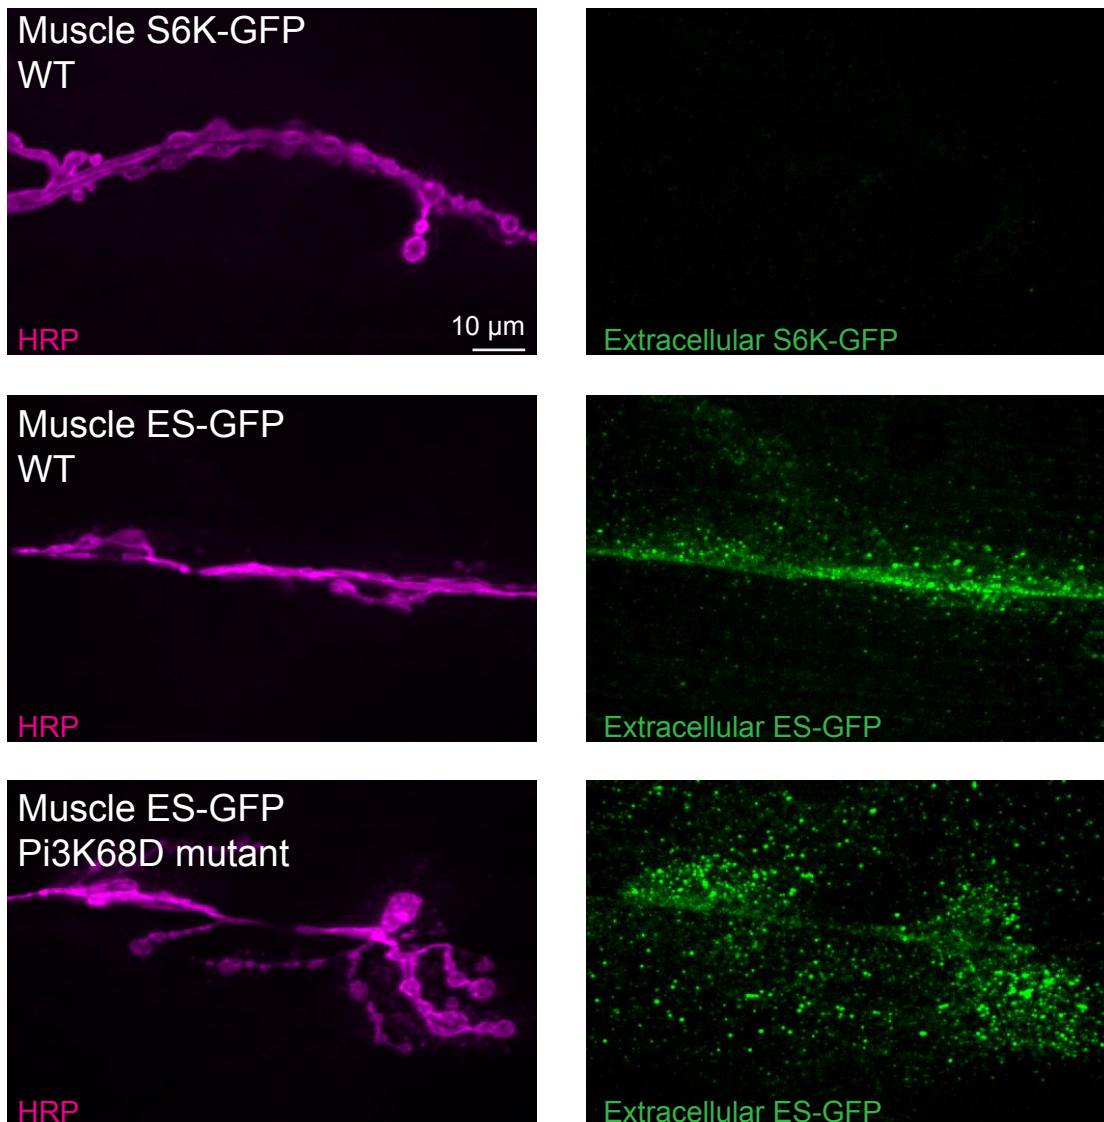

Supplement: supp [file elife-31535-supp-v1.zip]

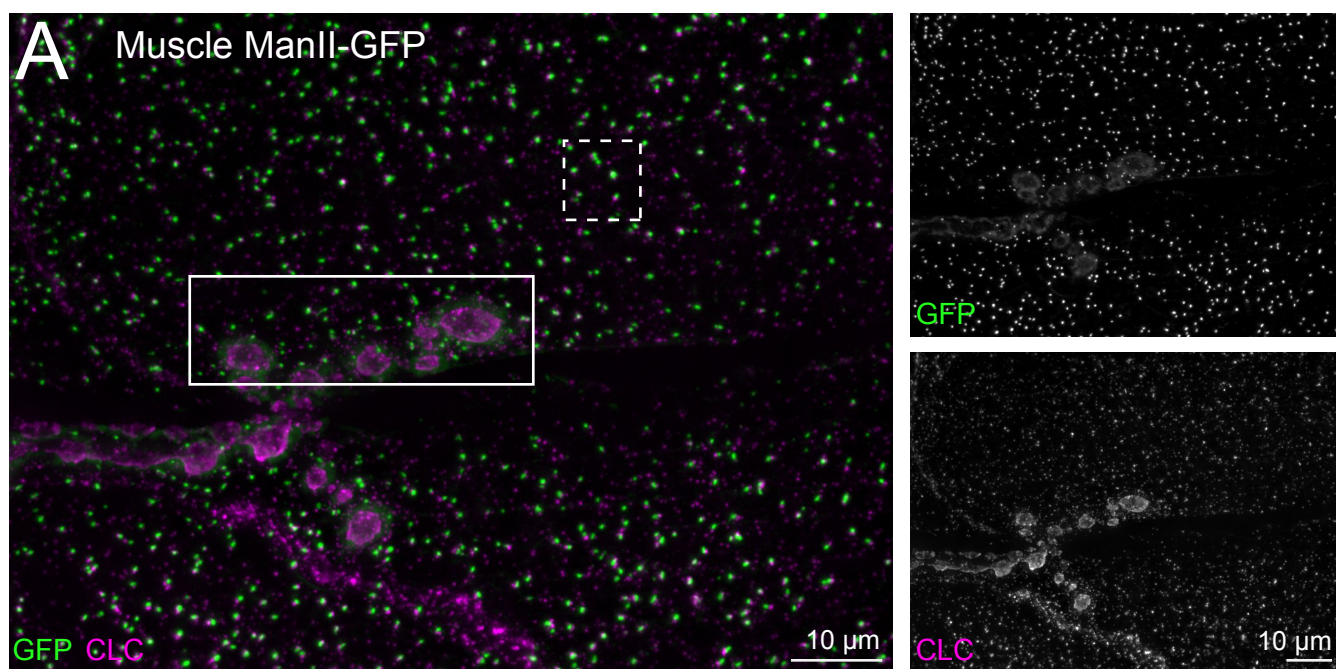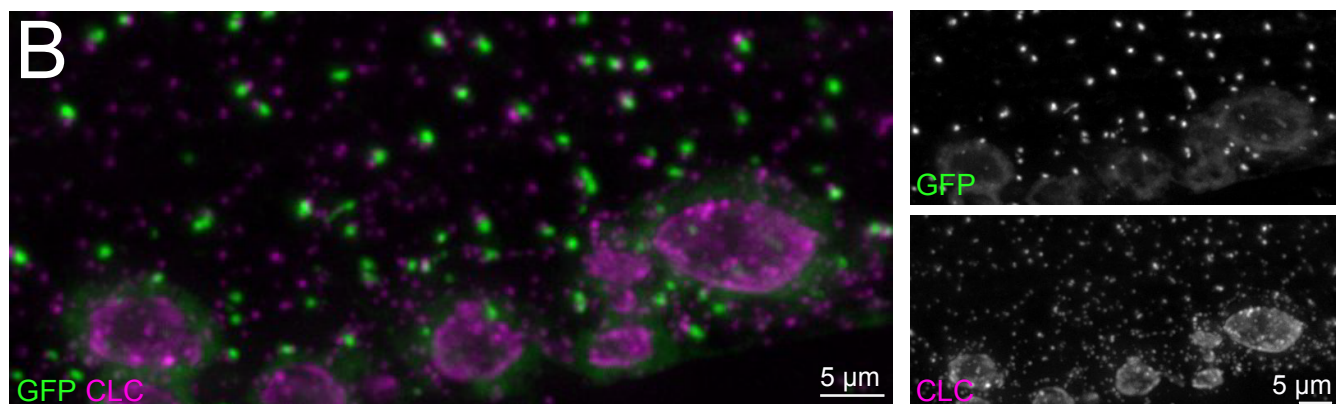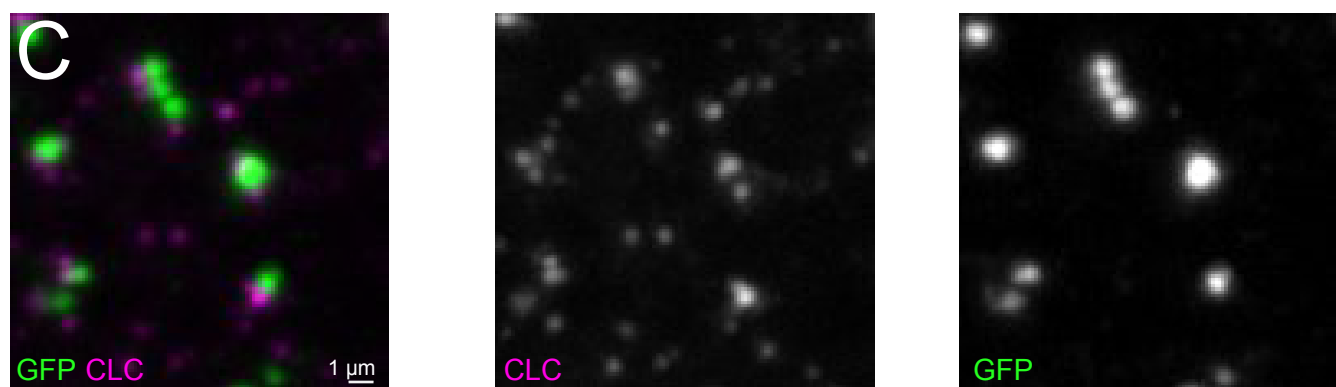

Supplement: supp [file elife-31535-supp-v1.zip]

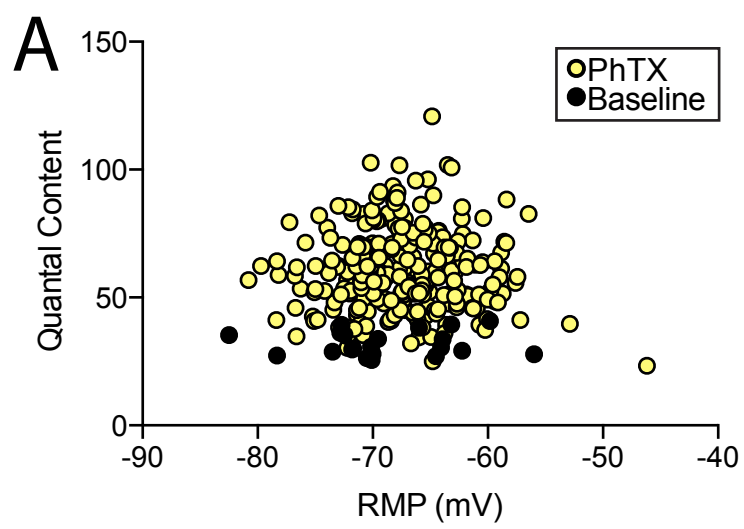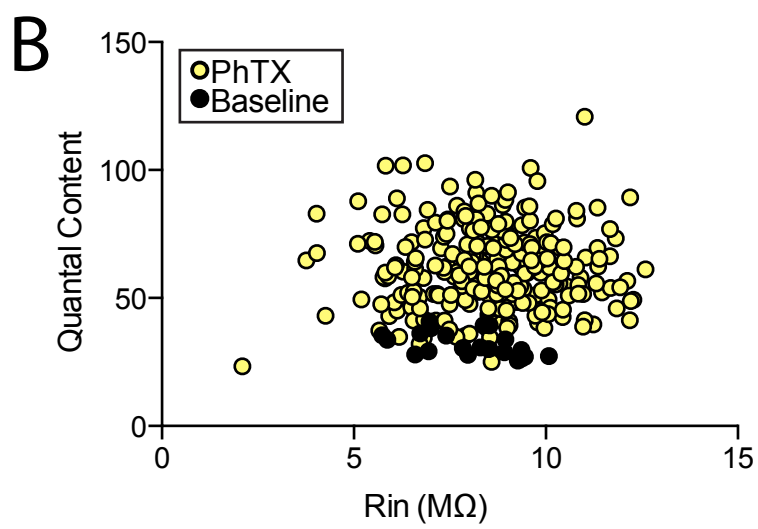

Supplement: supp [file elife-31535-supp-v1.zip]

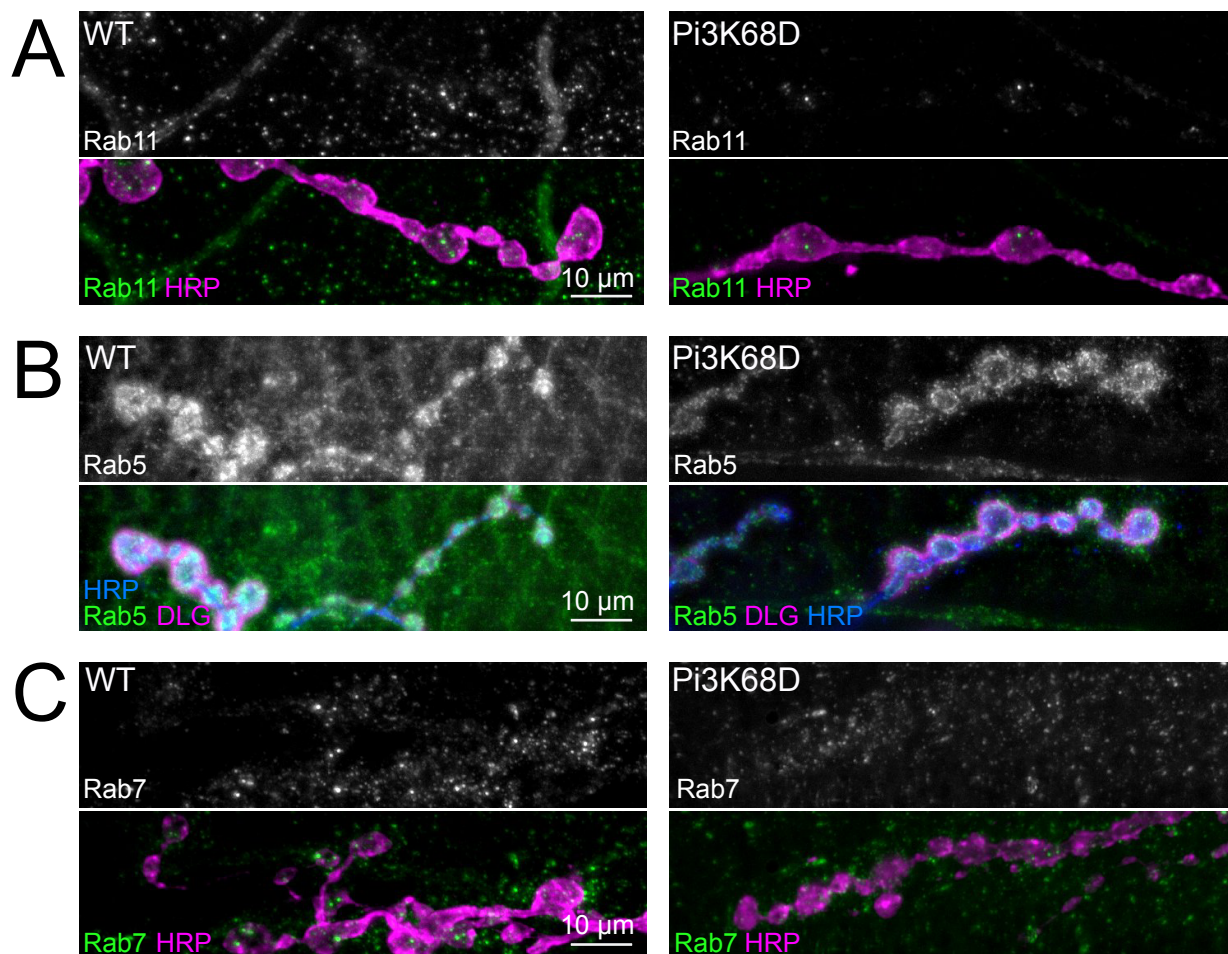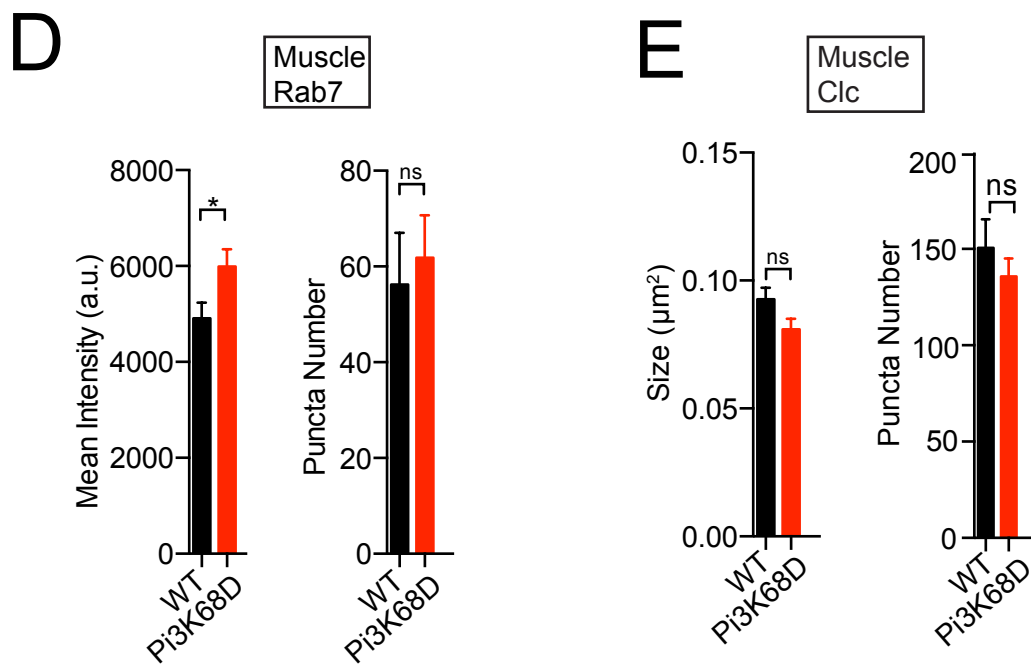

Supplement: supp [file elife-31535-supp-v1.zip]
